# Supplementary material for: Assessment of antimicrobial prescribing patterns, guidelines compliance, and appropriateness of antimicrobial prescribing in surgical-practice units: point prevalence survey in Malaysian teaching hospitals
Source: PubMed Central journal article supplement (PMC11076853; doi:10.3389/fphar.2024.1381843), 2024-04-24
Supplement: Image1.pdf [file Image1.pdf]

|                          |                                      |                                   |                            |                                                                   |             |                  |                           |
|--------------------------|--------------------------------------|-----------------------------------|----------------------------|-------------------------------------------------------------------|-------------|------------------|---------------------------|
| <b>Audit date</b><br>/ / | <b>Patient identification number</b> | <b>Date of birth / age</b><br>/ / | <b>Gender</b><br>M / F / O | <b>Specialty</b> <input type="checkbox"/> currently in ICU / NICU | <b>Ward</b> | <b>Weight kg</b> | <b>eGFR / CrCl ml/min</b> |
|--------------------------|--------------------------------------|-----------------------------------|----------------------------|-------------------------------------------------------------------|-------------|------------------|---------------------------|

| <b>Antimicrobials</b><br>Only record the antimicrobials as prescribed at 08:00 am on the audit day and any surgical prophylaxis or stat doses in the previous 24 hours |  |               |       |      |      |                       |                                           |                               |                            |                               |                  |                       |                 |                            |                    |                    |                     |                                                |                               |                       |
|------------------------------------------------------------------------------------------------------------------------------------------------------------------------|--|---------------|-------|------|------|-----------------------|-------------------------------------------|-------------------------------|----------------------------|-------------------------------|------------------|-----------------------|-----------------|----------------------------|--------------------|--------------------|---------------------|------------------------------------------------|-------------------------------|-----------------------|
| For NICU patients<br>Birth weight kg      Gestational age weeks                                                                                                        |  | Antimicrobial | Route | Dose | Freq | Indication documented | Specify documented or presumed indication | Review / stop date documented | Guideline compliance (1-6) | Surgical prophylaxis > 24 hrs | Allergy mismatch | Microbiology mismatch | Incorrect route | Incorrect dose / frequency | Incorrect duration | Spectrum too broad | Spectrum too narrow | Indication does not require any antimicrobials | If restricted: approval given | Appropriateness (1-5) |
| Start date                                                                                                                                                             |  |               |       |      |      |                       |                                           |                               |                            |                               |                  |                       |                 |                            |                    |                    |                     |                                                |                               |                       |
| / /                                                                                                                                                                    |  |               |       |      |      |                       |                                           |                               |                            |                               |                  |                       |                 |                            |                    |                    |                     |                                                |                               |                       |
| / /                                                                                                                                                                    |  |               |       |      |      |                       |                                           |                               |                            |                               |                  |                       |                 |                            |                    |                    |                     |                                                |                               |                       |
| / /                                                                                                                                                                    |  |               |       |      |      |                       |                                           |                               |                            |                               |                  |                       |                 |                            |                    |                    |                     |                                                |                               |                       |
| / /                                                                                                                                                                    |  |               |       |      |      |                       |                                           |                               |                            |                               |                  |                       |                 |                            |                    |                    |                     |                                                |                               |                       |
| / /                                                                                                                                                                    |  |               |       |      |      |                       |                                           |                               |                            |                               |                  |                       |                 |                            |                    |                    |                     |                                                |                               |                       |

**Allergies and adverse drug reactions to antimicrobials**

nil known       not documented

present; record the antimicrobial and the nature of the reaction

**Microbiology**       not collected / not assessable

collected; record the specimen type, organism and susceptibilities if relevant

**Guideline compliance**

1. Compliant with Therapeutic Guidelines
2. Compliant with locally endorsed guidelines\*
3. Non-compliant with guidelines
4. Directed therapy
5. No guidelines available
6. Not assessable

\*Select Therapeutic Guidelines if local guidelines are the same

**Clinical notes or comments**

Renal replacement therapy given within the previous 24 hours; eg. dialysis

**Surgical procedure if performed**

If prophylaxis given within previous 24 hours; include in audit

**Appropriateness**

1. Optimal
2. Adequate
3. Suboptimal
4. Inadequate
5. Not assessable

*Hospital-wide point prevalence survey. This methodology required all inpatients to be assessed so prevalence of antimicrobial use could be calculated. Data were collected on both the number of inpatients on antimicrobials (numerator) and the total number of inpatients (denominator). This option is recommended to be completed on a single calendar day. However, if this was not possible, wards could be surveyed on separate days provided that all patients were surveyed once only. Source: James et al. The feasibility and generalizability of assessing the appropriateness of antimicrobial prescribing in hospitals: a review of the Australian National Antimicrobial Prescribing Survey. Vol. 4, JAC-Antimicrobial Resistance. 2022.*
