# Supplementary material for: Assessment of antimicrobial prescribing patterns, guidelines compliance, and appropriateness of antimicrobial prescribing in surgical-practice units: point prevalence survey in Malaysian teaching hospitals
Source: PubMed Central journal article supplement (PMC11076853; doi:10.3389/fphar.2024.1381843), 2024-04-24
Supplement: Image2.pdf [file Image2.pdf]

## Hospital NAPS appropriateness definitions

|               |                        | If endorsed guidelines are <u>present</u>                                                                                                                                                                                                                                                                                                                                                                                                                                                                                                                                   | If endorsed guidelines are <u>absent</u>                                                                                                                                                                                                                                                                                                                                 |
|---------------|------------------------|-----------------------------------------------------------------------------------------------------------------------------------------------------------------------------------------------------------------------------------------------------------------------------------------------------------------------------------------------------------------------------------------------------------------------------------------------------------------------------------------------------------------------------------------------------------------------------|--------------------------------------------------------------------------------------------------------------------------------------------------------------------------------------------------------------------------------------------------------------------------------------------------------------------------------------------------------------------------|
| Appropriate   | 1 Optimal <sup>1</sup> | Antimicrobial prescription follows either the Therapeutic Guidelines <sup>2</sup> or endorsed local guidelines <i>optimally</i> , including antimicrobial choice, dosage, route and duration <sup>3</sup>                                                                                                                                                                                                                                                                                                                                                                   | The antimicrobial prescription has been reviewed and endorsed by an infectious diseases clinician or a clinical microbiologist<br><b>OR</b><br>The prescribed antimicrobial will cover the likely causative or cultured pathogens <b>and</b> there is not a narrower spectrum or more appropriate antimicrobial choice, dosage, route or duration <sup>3</sup> available |
|               | 2 Adequate             | Antimicrobial prescription does not optimally follow the Therapeutic Guidelines <sup>2</sup> or endorsed local guidelines, including antimicrobial choice, dosage, route or duration <sup>3</sup> , however, is a <b>reasonable</b> alternative choice for the likely causative or cultured pathogens<br><b>OR</b><br>For surgical prophylaxis, as above <b>and</b> duration <sup>3</sup> is less than 24 hours                                                                                                                                                             | Antimicrobial prescription including antimicrobial choice, dosage, route and duration <sup>3</sup> is not the most optimal, however, is a <b>reasonable</b> alternative choice for the likely causative or cultured pathogens<br><b>OR</b><br>For surgical prophylaxis, as above <b>and</b> duration <sup>3</sup> is less than 24 hours                                  |
| Inappropriate | 3 Suboptimal           | There may be a mild or non-life-threatening allergy mismatch<br><b>OR</b><br>Antimicrobial prescription including antimicrobial choice, dosage, route and duration <sup>3</sup> , is an <b>unreasonable</b> choice for the likely causative or cultured pathogens, including: <ul style="list-style-type: none"> <li>spectrum excessively broad, unnecessary overlap in spectrum of activity, dosage excessively high or duration excessively long</li> <li>failure to appropriately de-escalate with microbiological results</li> </ul>                                    |                                                                                                                                                                                                                                                                                                                                                                          |
|               | 4 Inadequate           | Antimicrobial prescription including antimicrobial choice, dosage, route or duration <sup>3</sup> is <b>unlikely</b> to treat the likely causative or cultured pathogens<br><b>OR</b><br>The documented or presumed indication does not require <b>any</b> antimicrobial treatment<br><b>OR</b><br>There may be a severe or possibly life-threatening allergy mismatch, or the potential risk of toxicity due to drug interaction<br><b>OR</b><br>For surgical prophylaxis, the duration <sup>3</sup> is greater than 24 hours (except where local guidelines endorse this) |                                                                                                                                                                                                                                                                                                                                                                          |
|               | 5 Not assessable       | The indication is not documented and unable to be determined from the notes<br><b>OR</b><br>The notes are not comprehensive enough to assess appropriateness<br><b>OR</b><br>The patient is too complex, due to multiple co-morbidities, allergies or microbiology results, <i>etc.</i>                                                                                                                                                                                                                                                                                     |                                                                                                                                                                                                                                                                                                                                                                          |

<sup>1</sup> Taking into account acceptable changes due to the patient's weight, allergy status, renal or hepatic function, or relevant drug interactions (if this information is available)

<sup>2</sup> Antibiotic Expert Group. Therapeutic Guidelines: Antibiotic. Version 16 (2019), or online version

<sup>3</sup> Duration should only be assessed if the guidelines state a recommended duration and the antimicrobial has already been dispensed for longer than this, or if there is a clear planned 'end date' documented
